# Supplementary material
Source: PubMed Central journal article supplement (PMC5285267)
Supplement: NIHMS840508-supplement-supl_info.pdf [file NIHMS840508-supplement-supl_info.pdf]

## **Supplemental Information**

### **One-step seeding of neural stem cells with vitronectin-supplemented medium for high throughput screening assays**

Sheng Dai<sup>1,2</sup>, Rong Li<sup>1</sup>, Yan Long<sup>1</sup>, Steve Titus<sup>1</sup>, Jinghua Zhao<sup>1</sup>, Ruili Huang<sup>1</sup>, Menghang Xia<sup>1</sup>, and Wei Zheng<sup>1</sup>

<sup>1</sup>National Center for Advancing Translational Sciences, National Institutes of Health, Bethesda, MD 20892, USA. <sup>2</sup>Sir Run Run Shaw Hospital, Zhejiang University School of Medicine, Hangzhou 310016, China.

Corresponding Author:

Wei Zheng, Ph.D.

National Center for Advancing Translational Sciences

National Institutes of Health

9800 Medical Center Drive, Bethesda, MD 20892-3375

Email: wzheng@mail.nih.gov

Tel.: (301)217-5251

**Content:**

**Supplemental Materials and Methods**

**Supplemental Figure 1.** Assay development and validation.

**Supplemental Figure 2.** Concentration-response curves of representative cytotoxic compounds determined in the ATP content assay, nuclear dye assay, and caspase 3/7 assay using one-step seeding of NSCs in 1536 well plates with rhVTN-N supplemented medium.

**Supplemental Figure 3.** Results of homogenous calcium response assay using NSCs one-step seeded in 384-well plates with rhVTN-N-supplemented medium.

**Supplemental Figure 4.** Results of calcium response determined in neurons differentiated from NSCs one-step seeded in commercial PDL-coated 384-well plate with rhVTN-N-supplemented medium.

**Supplemental Figure 5.** Results of single cell calcium responses in neural stem cells and neurons one-step seeded in 384-well plates with rhVTN-N-supplemented medium.

**Supplemental Figure 6.** Flow chart of HTS assays using NSCs and NSC-differentiated neurons by directly plating NSCs with rhVTN-N-supplemented medium.

**Supplemental Table 1.** Summary of substrates tested in the high throughput iPSC NSCs assays with one-step seeding.

**Supplemental Table 2.** Summary of 24 cytotoxic compounds determined in the high throughput iPSC NSCs assays with rhVTN-N one-step seeding.

**Supplemental Table 3.** Summary of published pre-coating substrates of neural cells

**Supplemental references**

## **Supplemental Materials and Methods**

**Compounds.** Twenty four compounds (**Table S2**) with reported neurotoxicity were selected for tests in cytotoxicity assays using NSCs differentiated from stem cells. All of the compounds were dissolved in DMSO as 10 mM stock solutions that were diluted in DMSO at a 1:3 ratio for eleven concentrations. AR-C 118925XX, Suraminates hexasodium salt, Tolterodine L-tartrate, and Telenzepine dihydrochloride were purchased from R&D Systems; Ionomycin from Tocris; Carbachol from Sigma-Aldrich; and EGTA-AM and BAPTA-AM from Santa Cruz Biotechnology. All of the compounds were dissolved in DMSO as 10 mM stock solutions that were diluted in DMSO at a 1:3 ratio for eleven concentrations.

**NSCs Induction from iPSCs.** Wild type (GM23450, Coriell Cell Repositories) and iPSCs previous derived from NPC patient fibroblasts<sup>1</sup> were cultured under the condition as reported by Beers J, et al.<sup>2</sup> Briefly, Matrigel (354277, Corning Matrigel® hESC-Qualified Matrix, LDEV-Free, Corning) was diluted in Advanced DMEM/F12 medium (Life Technologies) to 200 µg/ml that was added to 6-well plates at 1 ml/well. After incubation for 1 hour at room temperature, the plates were washed once with medium. The iPSCs were suspended in Essential 8™ Medium (A1517001, Life Technologies) and seeded to 6-well plates coated with Matrigel as above. When cells reached 80-90% confluency, cells were digested with 0.5 mM EDTA and reseeded to Matrigel coated 6-well plates at  $3 \times 10^5$  cells/well for NSC differentiation. Neural Induction Medium kit (Life Technologies) was used for generation of neural stem cells from iPSCs. On Day 1 after iPSC splitting (15-25% confluency), the culture medium was replaced with the Neural Induction Medium containing the Neurobasal medium supplemented with Neural Induction Supplement. On day 7, the initial NSCs were dissociated with Accutase and plated for further expansion in neural expansion medium containing Neurobasal medium, Advanced™ DMEM/F-12 medium and 1X GIBCO Neural Induction Supplement (Catalog # 21103-049, 12634010 and A16477-01, Life Technologies). After 2 passages, the culture medium was switched to StemPro NSC SFM (A1050901, Life Technologies) containing knockout DMEM/F12, StemPro neural supplement, 20ng/ml bFGF, 20ng/ml EGF and 1X GlutaMAX. Immunohistochemistry staining with antibodies against Nestin, SOX1, SOX2, PAX6, Vimentin, and SSEA4 neural markers was utilized to characterize the NSCs induced from human iPSCs. The WT NSCs and NPC NSCs were cultured as previously described<sup>1</sup>.

**Microtiter plates pre-coating procedures.** Polystyrene plates (384- and 1536-well, tissue-culture treated) were purchased from Greiner Bio-One (Monroe, NC) and Poly-D-Lysine (PDL) coated 384-well plates were purchased from Corning. As a control for assays using neural stem cells, Matrigel was freshly coated to assay plates before each experiment. Briefly, 5µl/well of 200µg/ml Matrigel in cold DMEM/F-12 medium was added to 1536-well plates and the plates were centrifuged for 5 minutes at 200g to allow

even coating on the bottom of plates followed by incubation at RT for one hour. Immediately before cell seeding, the plates were inverted and centrifuged for 2 minutes at 200g to remove the coating liquid. As a control for assays using neurons differentiated from neural stem cells, the poly-L-ornithine and laminin dual coating was used. Briefly, 384-well plates received 20 $\mu$ l/well of 20 $\mu$ g/ml PLO (P3655, Sigma) in distilled water and incubated overnight at room temperature followed by three plate-washes with distilled water. The plates received 20 $\mu$ l/well of 10 $\mu$ g/ml laminin in phosphate-buffered saline (PBS) without calcium or magnesium and incubated for 3 hours at 37 °C followed by one plate wash before use.

**Immunofluorescence Staining of iPSC NSCs and Neuronal Cells.** Immunohistochemistry staining of NSC markers (Nestin, SOX-1, SOX-2, PAX6, SSEA4, and Vimentin) and neuronal cell markers ( $\beta$ -III Tubulin (TUJ1), microtubule-associated protein 2 (MAP2) and Neurofilament L (NF-L)) as well as astrocyte marker (GFAP) were performed for characterizations of differentiated NSCs and neurons (**Table S4**). The NSCs and neuronal cells were stained in 1536- and 384-well plates respectively. All the liquid handling steps including aspiration, dispensing and washing were conducted in automated microtiter plate liquid handling system (GNF system). The volume for blocking, antibody incubation and nuclear staining was 5 $\mu$ L/well for 1536-well plates and 25 $\mu$ L/well for 384-well plates and was 10 $\mu$ L/well and 50 $\mu$ L/well for plate washing. The same cell staining buffer (420201, Biolegend) was used to block and dilute antibodies. Briefly, 8% paraformaldehyde was added to 1536- or 384-well plates at the equal volume with the culture medium in the plates and incubated with cells for 30 minutes to fix cells. After aspirating the fixation solution, 5 $\mu$ L/well and 25  $\mu$ L/well of 0.3% Triton X-100 was added into 1536-well and 384-well plates respectively, and incubated for 20 minutes for cell membrane permeabilization followed by 1 hour blocking. The cells were then incubated with primary antibodies at optimized concentration at 4 °C overnight. After washing 3 times with PBS, correlated secondary antibodies were added. Cells were then stained with Hoechst 33342 (H1399, Life Technologies) for 20 minutes after 3 PBS washes and imaged on an IN Cell 2200 Imaging system (GE Healthcare Life Sciences) with a 40X objective lens and FITC or/and CY5 and DAPI filter sets.

**Karyotyping of iPSC NSCs growing on rhVTN-N.** The NSCs suspended in the medium added with 20 $\mu$ g/ml rhVTN-N were seeded to 6-well plates and the cells were cultured for at least 10 passages. The cells were sent to the cytogenetics Lab of the WiCell Research Institute (WI) for karyotyping analysis.

**Data analysis and statistics.** In the cytotoxicity assays, S/B ratio was calculated by dividing the luminescence or fluorescence signal readout from wells with cells added with DMSO control by those from wells with the highest concentration of cytotoxic compound (such as thapsigargin) or calcium

antagonists compounds. Z-factor was calculated using the following equation:  $Z = 1 - ((3 \times \text{s.d.}_{\text{total}} + 3 \times \text{s.d.}_{\text{basal}}) / (\text{mean}_{\text{total}} - \text{mean}_{\text{basal}}))$ , where  $\text{sd}_{\text{total}}$  and  $\text{mean}_{\text{total}}$  are the standard deviation and mean of DMSO treated wells, and  $\text{s.d.}_{\text{basal}}$  and  $\text{mean}_{\text{basal}}$  are the standard deviation and mean of wells treated with cytotoxic compound (thapsigargin) or calcium antagonists compounds. CV (%) was calculated as  $(\text{s.d.}/\text{mean}) \times 100$ .

Unless otherwise noted, all values are expressed as the mean  $\pm$  s.d. (n = 3). For the statistical analysis, results were analyzed using one-way or two-way ANOVA and differences were considered statistically significant if  $p < 0.05$ .

**Figure S1**

**A**

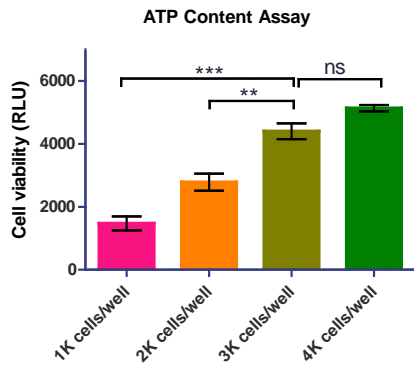

**B**

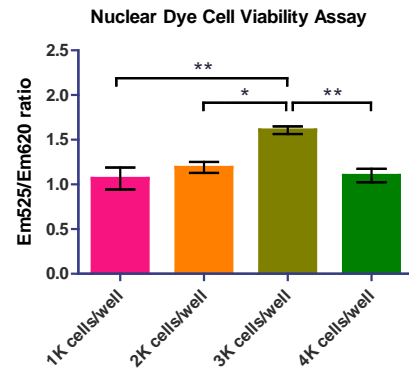

**C**

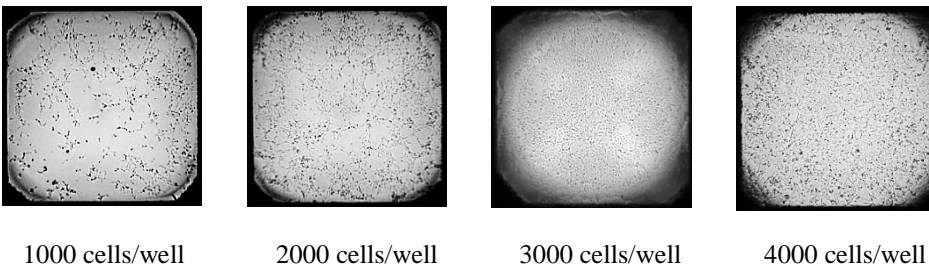

**D**

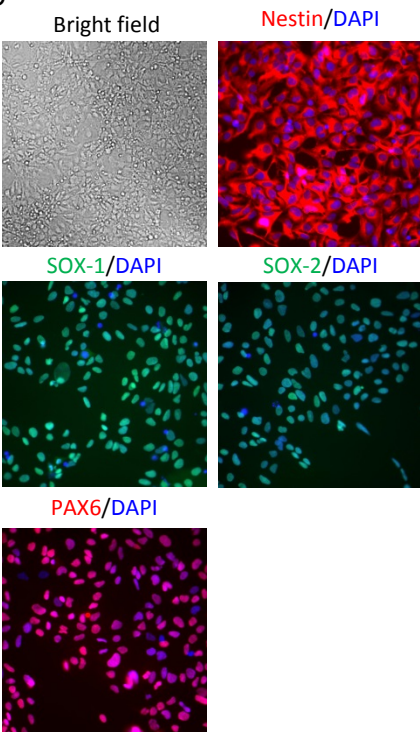

**E**

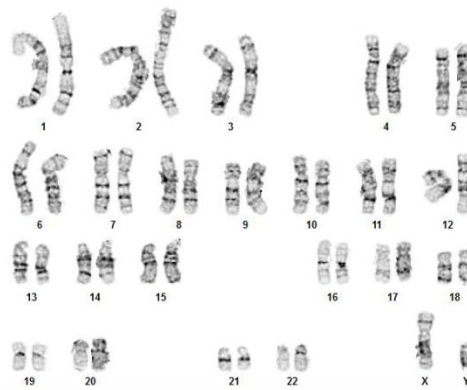

**F**

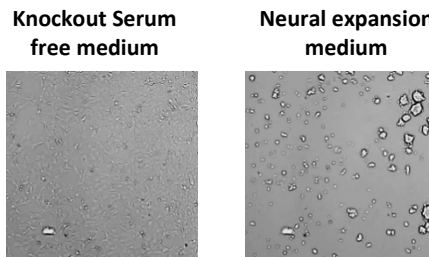

**Figure S1.** Assay development and validation. NSCs cultured in 1536-well plates were first tested at densities of 1000, 2000, 3000 and 4000 cells/well in 1536-well plates using the ATP content and nuclear dye staining assays. The density of 3000 cells/well yielded more viable cells than 1000 and 2000 cells/well both in (A) ATP content and (B) nuclear dye cell viability assays (3000 cells/well vs. 1000 cells/well,  $p < 0.001$  in ATP content assay and  $p < 0.01$  in nuclear dye cell viability assays, 3000 cells/well vs. 2000 cells/well,  $p < 0.01$  in ATP content assay and  $p < 0.05$  in nuclear dye cell viability assays). Although there was no difference of the cell viability at 4000 cells/well in the ATP content assay ( $p > 0.05$ ), the relative fluorescence unit (RFU) ratio of the live cells to dead cells at the density of 3000 cells/well was significant higher than 4000 cells/well ( $p < 0.01$ ) in the nuclear dye cell viability assay. As a result, 3000 cells/well was selected for subsequent experiments. Data are represented as mean  $\pm$  SEM of three replicates. (C) The panel of images showed the bright field pictures (10x) the neural stem cells in the 1536-well plates at different cell density. (D) Normal neural stem cells morphology and markers, as well as (E) normal 46XY karyotype observed in NSC directly seeded and cultured in regular 6-well plates for at least 10 passages with rhVTN-N-supplemented medium. (F) The WT NSCs could not attach the assay plates and unable to grow when the one-step seeding method was used with the neural expansion medium composed of Neurobasal® medium, Advance DMEMF-12 medium and GIBCO® Neural Induction Supplement (Catalog # 21103-049, 12634010 and A16477-01, Life Technologies, as neural expansion medium) supplemented with rhVTN-N.

## Figure S2

### i. Toxin

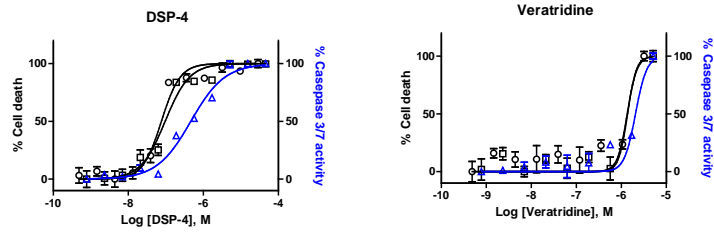

### ii. Antineoplastic Agent

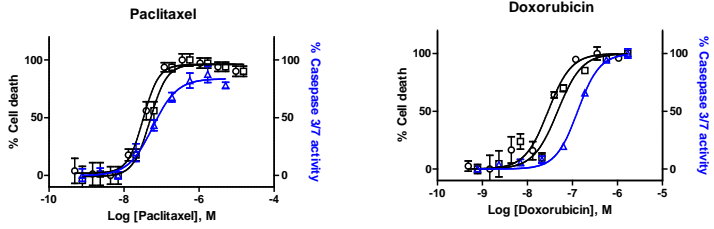

### iii. Insecticide

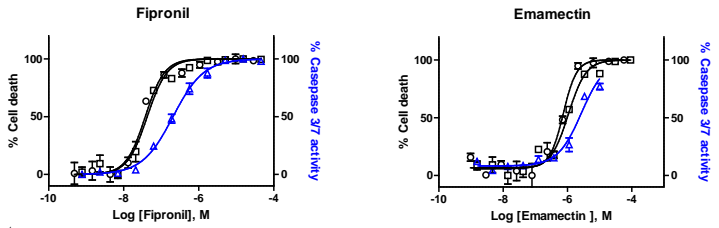

### iv. Anti-infective Agent

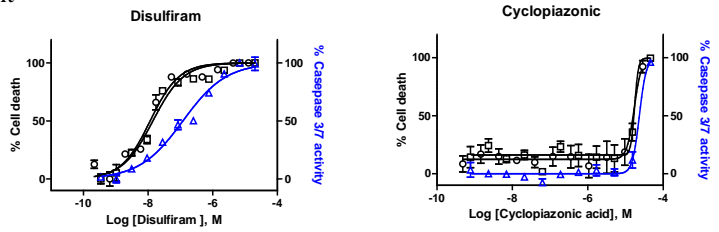

### v. Others

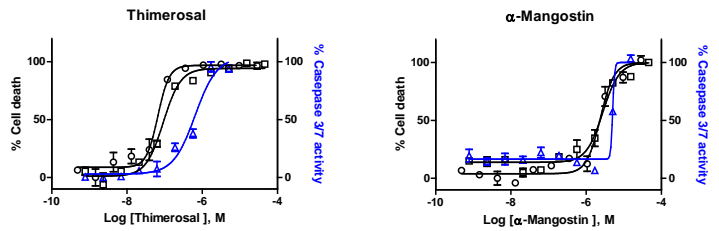

**Figure S2.** Concentration-response curves of representative cytotoxic compounds. The compound activities were determined in the ATP content assay ( $\square$ ), nuclear dye assay ( $\circ$ ), and caspase 3/7 assay ( $\Delta$ ) using NSCs plated in 1536 well plates with rhVTN-N added medium. The  $IC_{50}$  values of all 24 compounds determined from these three assays were listed in **Table S2**. Data are represented as mean  $\pm$  SEM of three replicates.



**Figure S3**

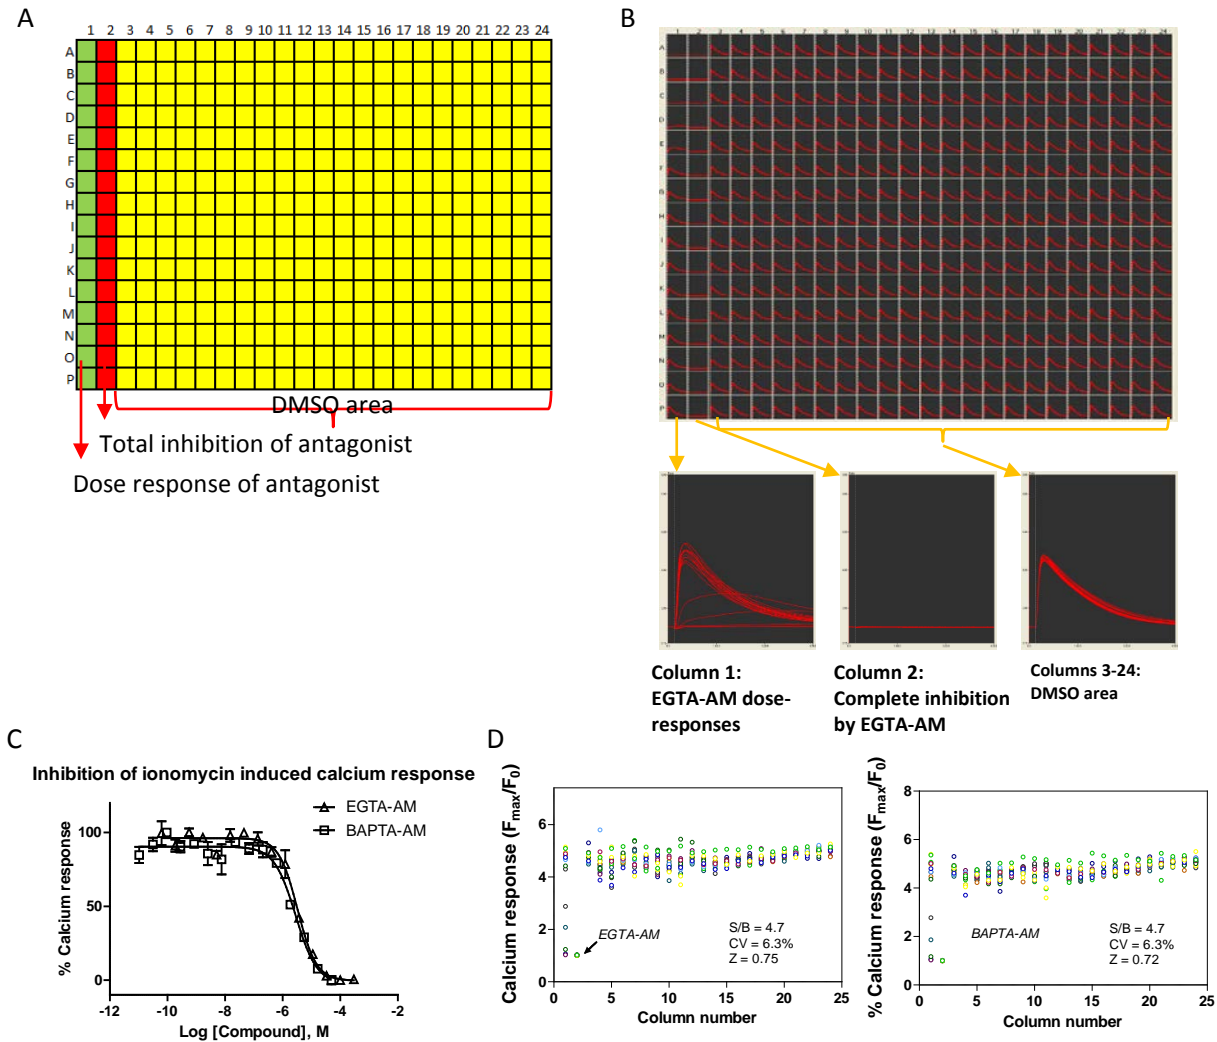

**Figure S3.** Results of homogenous calcium response assay using NSCs one-step seeded in 384-well plates with rhVTN-N-supplemented medium. (A) A plate map for the DMSO plate test with different antagonists. Column 1 was the concentration titration of antagonists, column 2 was the highest concentration of antagonists for complete inhibition, and columns 3 to 24 are wells that had DMSO added as a control. The whole plate was stimulated with the  $EC_{50/80}$  amount of agonists after taking the base line signal during the assay. (B) Tracers of kinetic calcium response determined in FDSS®  $\mu$ CELL kinetic fluorescence plate reader (Hamamatsu). Top panel: Ethyleneglycol-*bis*( $\beta$ -aminoethyl)-N,N,N',N'-tetraacetoxymethyl ester (EGTA-AM) inhibition of ionomycin induced calcium response. Bottom panel: combined multiplex tracer of each column as indicated. (C) Concentration-dependent inhibition curves of EGTA-AM and 1,2-Bis(2-aminophenoxy)ethane-N,N,N',N'-tetraacetic acid tetrakis-acetoxymethyl ester (BAPTA-AM) determined on 1  $\mu$ M ionomycin induced calcium response in NSCs. The  $IC_{50}$  values for EGTA-AM and BAPTA-AM were 3.3  $\mu$ M and 2.8  $\mu$ M, respectively. Data are represented as mean  $\pm$  SEM of three replicates. (D) Scatter plots of DMSO plate tests with the complete inhibition (0% response) was defined by 100  $\mu$ M EGTA-AM or 50  $\mu$ M BAPTA-AM. The S/B ratio, CV, and Z-factor were listed in the related plots.

**Figure S4**

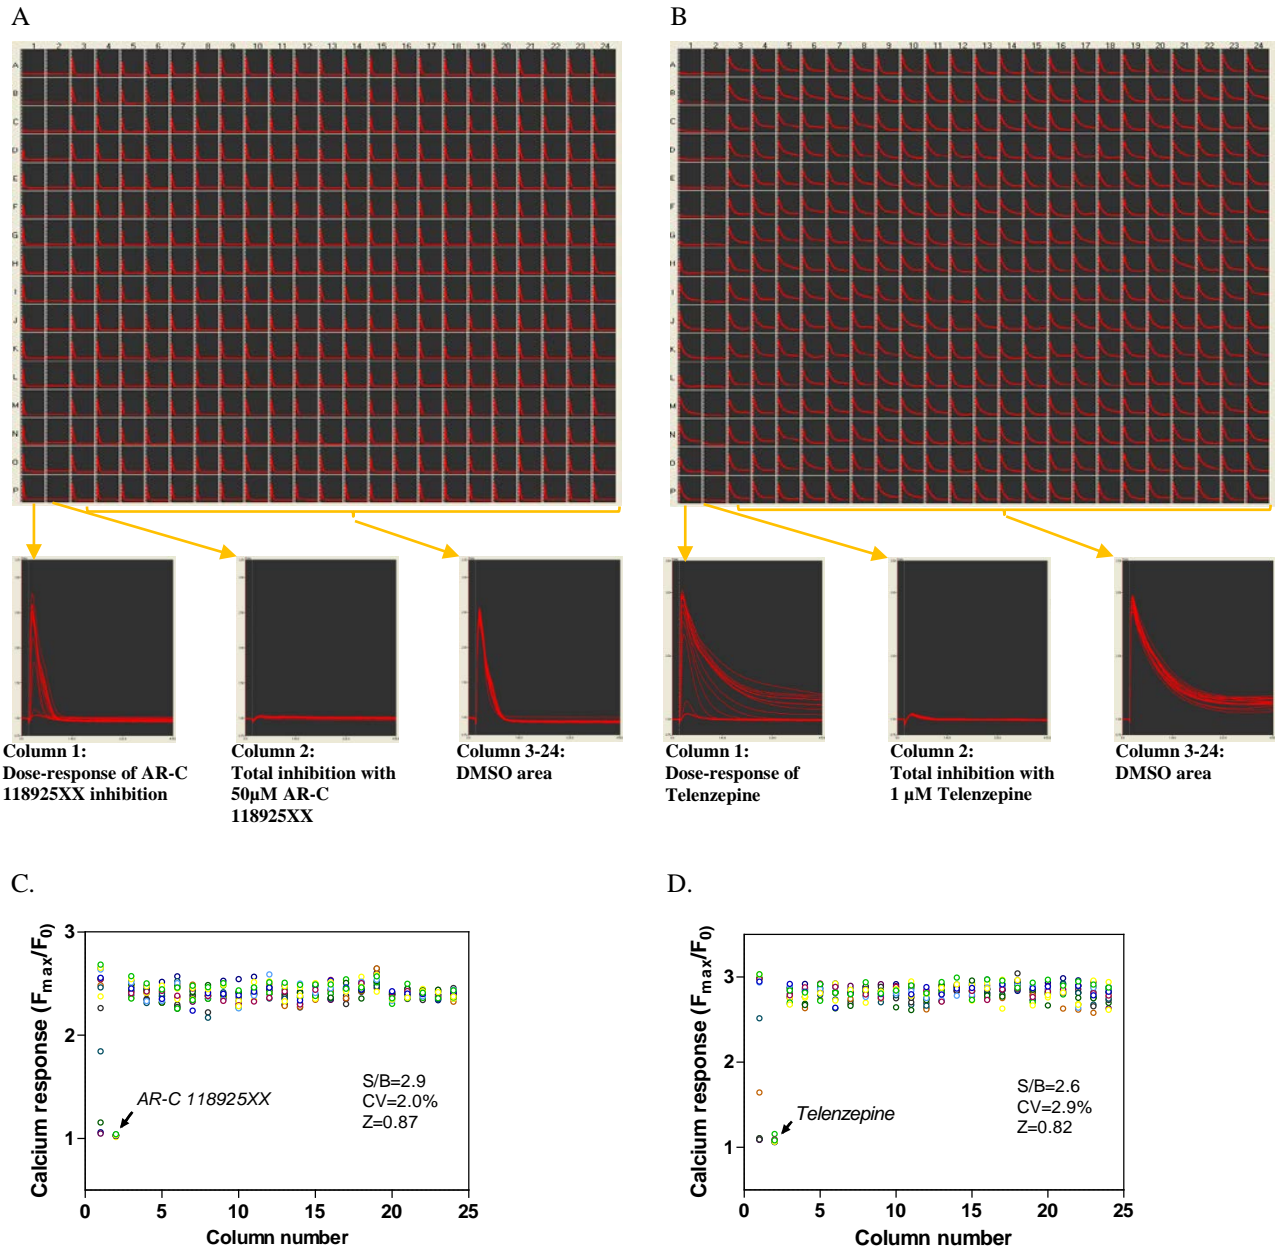

**Figure S4.** Results of calcium response determined in neurons differentiated from NSCs one-step seeded in commercial PDL-coated 384-well plate with rhVTN-N-supplemented medium. Whole-plate kinetic fluorescence intensity tracers of calcium responses in neurons stimulated by 0.1  $\mu$ M ATP ( $EC_{80}$  concentration) through the purinergic receptor (A) and 1  $\mu$ M carbachol through the acetylcholine muscarinic receptor (B). The column-1 added with a titration of related antagonist and column 2 added with a high concentration of antagonist that resulted 100% inhibition of calcium response. Using the response in wells with the high concentration of antagonist as 100% inhibition, the assay parameters (S/B ratio, CV and Z-factor) of the DMSO plate test were calculated and listed in the scatter plot (C) for ATP stimulated calcium response with AR-C 118925XX and (D) for the carbachol-stimulated calcium response with telenzepine dihydrochloride.

**Figure S5**

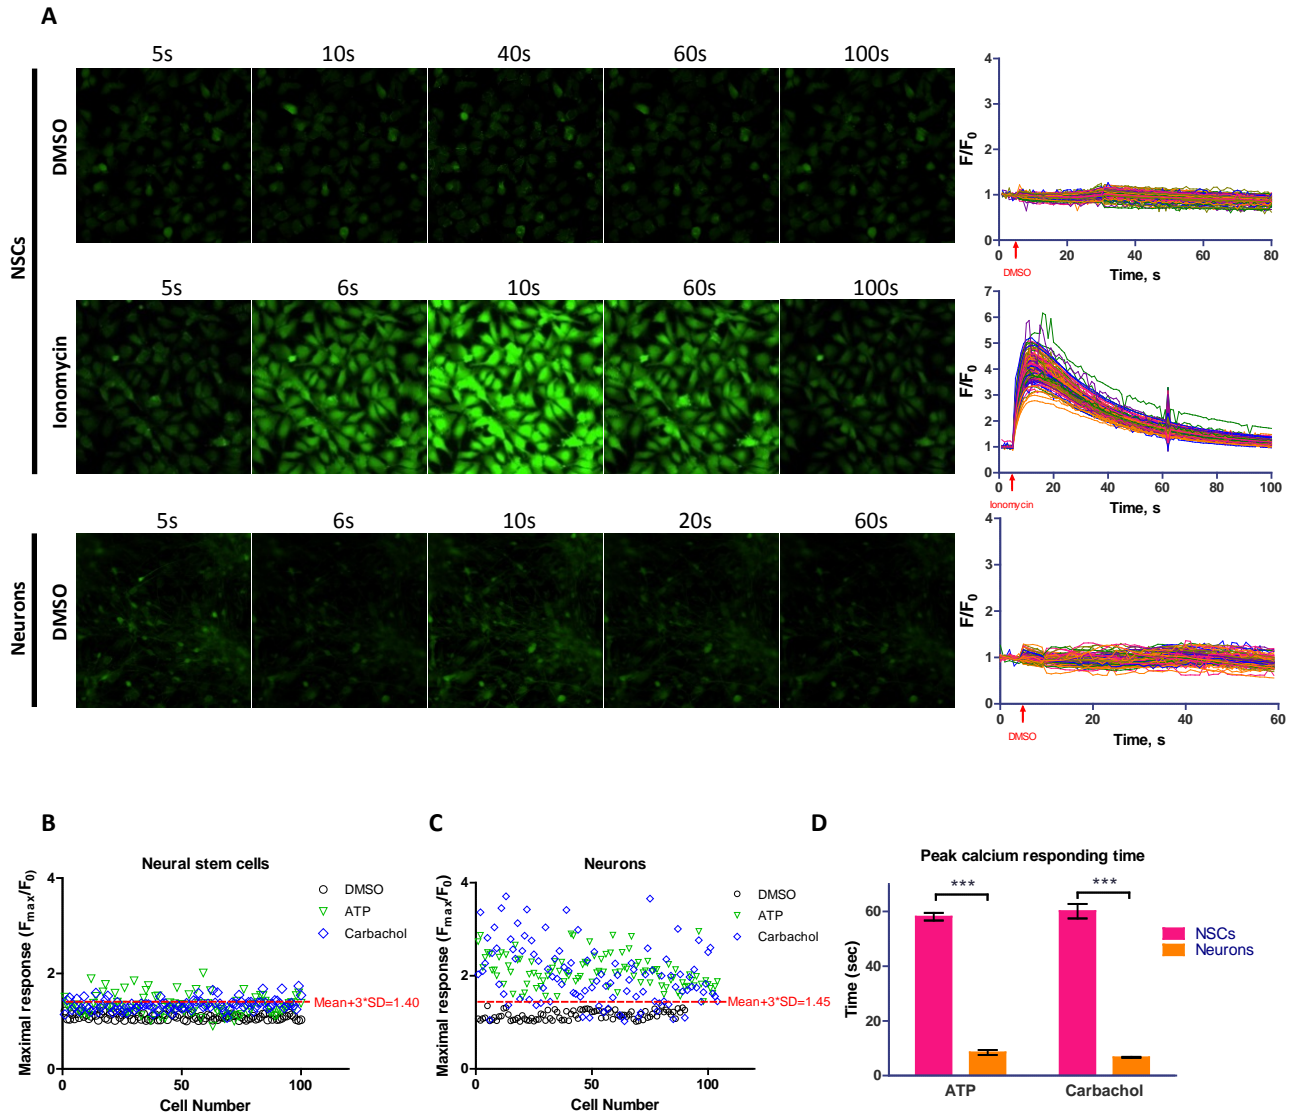

**Figure S5.** Results of single cell calcium responses in neural stem cells and neurons directly one-step in commercial 384-well PDL-plates with rhVTN-N-supplemented medium. (A) Serial fluorescence images and kinetic tracers of neural stem cells and neurons recorded in a single cell calcium response assay. Positive responding cells from populations of NSCs (B) and neurons (C). The calcium responses in NSCs and neurons were stimulated by DMSO control, 0.1  $\mu$ M ATP, or 1  $\mu$ M carbachol. The positively responding cells were identified as these with the maximal response equal to or above the average ( $F_{max}/F_0$ ) of total control cells plus 3 times the standard deviations (sd) (mean of  $F_{max}/F_0 + 3 \times \text{sd}$ ). The calculated cut-off ratios in NSC and neurons were 1.40 and 1.45, respectively. (D) Comparison of average times to reach the peak calcium response in NSCs and neurons. The average times to reach the peak response to the ATP and carbachol in NSCs were 58 and 60 seconds, respectively. But in neurons the times decreased to 8.5 and 6.7 seconds, respectively ( $p < 0.01$ ). The data suggested that neuronal differentiation from NSCs to neurons increased expression of receptors/channels. Data are represented as mean  $\pm$  SEM of three biological replicates.

**Figure S6**

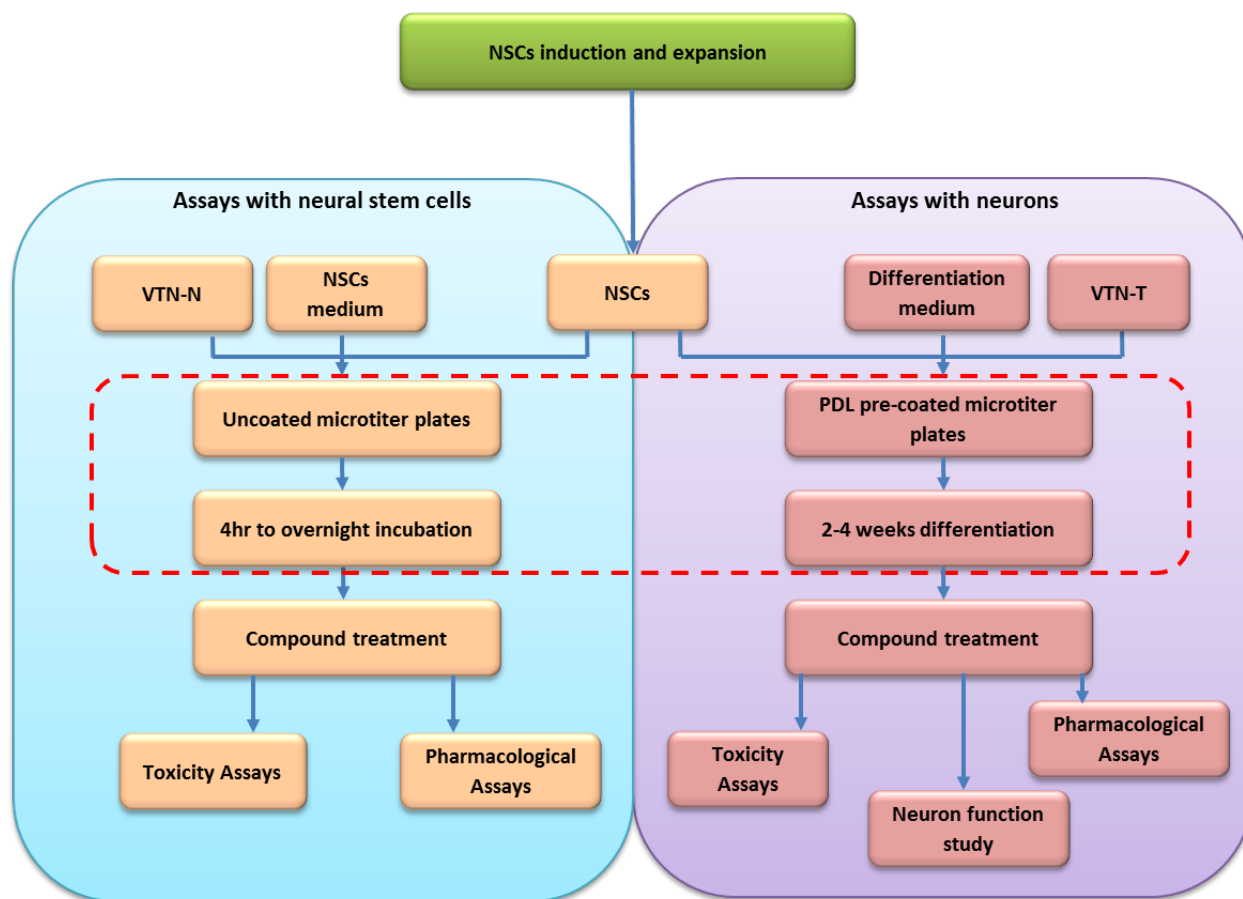

**Figure S6.** Flow chart of HTS assays using NSCs and NSC-differentiated neurons by directly plating NSCs with rhVTN-N-supplemented medium.

**Table S1. Summary of substrates tested in the high throughput iPSC NSCs assays with one-step seeding.**

| <b>Substrates Name</b> | <b>Final Concentration</b> | <b>Vendor</b>     | <b>Catalog#</b> |
|------------------------|----------------------------|-------------------|-----------------|
| Matrigel               | 200µg/ml                   | CORNING INC.      | 354277          |
| rhVTN-N                | 10µg/ml                    | Life Technologies | A14700          |
| Fibronectin            | 10µg/ml                    | Life Technologies | PHE0023         |
| Geltrex Matrix         | 1%                         | Life Technologies | A1413302        |
| Laminin                | 10µg/ml                    | SIGMA             | L4544           |
| Poly-D-Lysine          | 20 µg/ml                   | SIGMA             | P6407           |
| Poly-L-Ornithine       | 20 µg/ml                   | SIGMA             | P3655           |
| Collagen Type IV       | 6µg/ml                     | SIGMA             | C6745           |
| Gelatin                | 50µg/ml                    | SIGMA             | G9391           |

rhVTN-N: Truncated recombinant human vitronectin

**Table S2. Summary of 24 cytotoxic compounds determined in the high throughput iPSC NSCs assays with rhVTN-N one-step seeding.**

| Category             | Compound Name         | ATP Content Assay |              | DNA Dye Assay |              | Caspase 3/7 Assay |              | Reported drug activity              | Reported mechanism of action                                                       |
|----------------------|-----------------------|-------------------|--------------|---------------|--------------|-------------------|--------------|-------------------------------------|------------------------------------------------------------------------------------|
|                      |                       | IC50 (μM)         | Efficacy (%) | IC50 (μM)     | Efficacy (%) | EC50 (μM)         | Efficacy (%) |                                     |                                                                                    |
| Toxin                | DSP-4                 | 0.09              | 99.69        | 0.06          | 100.00       | 0.54              | 99.97        | Adrenergic neurotoxin               | Inhibit the uptake of noradrenaline <sup>3</sup>                                   |
|                      | Veratridine           | 2.46              | 100.00       | 1.39          | 100.00       | 2.06              | 100.00       | Steroid-derived alkaloid neurotoxin | Voltage-gated Na <sup>+</sup> channel opener <sup>4</sup>                          |
| Insecticide          | MPTP                  | 0.006             | 80.49        | 0.004         | 77.96        | 0.010             | 89.72        | parkinsonian toxin                  | Damage to substantia nigra pars compacta dopaminergic neurons <sup>5</sup>         |
|                      | Diazinon              | 5.73              | 100.00       | 4.08          | 100.00       | 6.16              | 100.00       | Organothiophosphorus insecticide    | Cholinesterase inhibitor <sup>6</sup>                                              |
|                      | Fenthion              | 2.12              | 77.87        | 2.20          | 77.42        | 4.54              | 77.20        | Insecticide and acaricide           | Cholinesterase inhibitor <sup>7</sup>                                              |
|                      | Fipronil              | 0.04              | 98.50        | 0.04          | 99.59        | 0.21              | 100.00       | Organochlorine insecticide          | Inhibit GABAA receptors and glycine receptors <sup>8</sup>                         |
|                      | Emamectin             | 0.91              | 100.00       | 0.67          | 100.00       | 2.73              | 82.27        | Insecticide                         | Chloride channel activation <sup>9</sup>                                           |
| Antineoplastic agent | Genistein             | 6.29              | 100.00       | 4.03          | 100.00       | 6.31              | 100.00       | Antineoplastic agent                | Inhibit protein-tyrosine kinase and topoisomerase-II <sup>10</sup>                 |
|                      | Doxorubicin           | 0.05              | 95.96        | 0.03          | 100.00       | 0.13              | 100.00       | Antineoplastic antibiotic           | Anthracycline topoisomerase inhibitor <sup>11</sup>                                |
|                      | Cytarabine            | 1.15              | 100.00       | 0.23          | 100.00       | 1.34              | 90.46        | Antimetabolite antineoplastic agent | Inhibit DNA synthesis <sup>12</sup>                                                |
|                      | Paclitaxel            | 0.03              | 94.10        | 0.03          | 97.13        | 0.10              | 94.45        | Antineoplastic agent                | Microtubule Inhibitor <sup>13</sup>                                                |
| Anti-infective agent | Oxaliplatin           | 1.43              | 92.76        | 1.48          | 90.12        | 4.29              | 103.79       | Platinum-based antineoplastic agent | Inhibit DNA synthesis <sup>14</sup>                                                |
|                      | Thimerosal            | 0.10              | 98.73        | 0.06          | 98.17        | 0.56              | 95.56        | Antibacterial and antifungal agent  | Inhibit sulfhydryl-dependent enzymes and proteins <sup>15</sup>                    |
|                      | Clarithromycin        | 0.004             | 80.29        | 0.003         | 100.00       | 0.003             | 115.01       | Antibiotic                          | Inhibit protein synthesis <sup>16</sup>                                            |
|                      | Clioquinol            | 2.28              | 99.14        | 1.57          | 95.13        | 5.26              | 69.14        | Topical anti-intestinal antiamebic  | Bacteriostatic, the precise mechanism of action is unknown <sup>17</sup>           |
|                      | α-Mangostin           | 1.98              | 100.00       | 2.03          | 102.12       | 5.10              | 103.31       | Antimicrobial, antioxidant          | Induce apoptosis via the mitochondrial pathway <sup>18</sup>                       |
|                      | Zidovudine            | 4.05              | 79.22        | 3.52          | 76.43        | 31.15             | 56.41        | Antiretroviral drug                 | Nucleoside analog reverse-transcriptase inhibitor <sup>19</sup>                    |
| Others               | Eugenol               | 8.48              | 78.93        | 7.93          | 82.06        | 21.14             | 83.27        | Local antiseptic and anesthetic     | Increase Histamine Release and Cell-mediated Immunity <sup>20</sup>                |
|                      | Disulfiram            | 0.014             | 100.00       | 0.012         | 100.00       | 0.12              | 99.16        | Treatment of chronic alcoholism     | Inhibitor of aldehyde dehydrogenase <sup>21</sup>                                  |
|                      | Cyclopiazonic acid    | 17.05             | 92.97        | 16.95         | 99.61        | 23.29             | 96.12        | Toxic fungal secondary metabolite   | Inhibit sarcoplasmic reticulum Ca <sup>2+</sup> -ATPase. <sup>22</sup>             |
|                      | Fenfluramine          | 13.37             | 79.19        | 8.61          | 82.02        | 14.13             | 62.53        | Appetite Depressant                 | Block serotonin uptake, provoke transport-mediated serotonin release <sup>23</sup> |
|                      | Paraquat dichloride   | 0.004             | 76.59        | 0.003         | 85.38        | 0.010             | 80.02        | Herbicide                           | Redox cycling and intracellular oxidative stress generation <sup>24</sup>          |
|                      | Aluminum chloride     | 0.006             | 80.56        | 0.006         | 82.85        | 0.004             | 90.85        | Antiperspirant, Astringents         | Increasing effects on inflammation and ROS <sup>25</sup>                           |
|                      | 3-Nitropropionic acid | 16.47             | 59.05        | 16.22         | 81.02        | 19.60             | 54.90        | Antihypertensive and Convulsant     | Inhibit succinate dehydrogenase <sup>26</sup>                                      |

**Table S3. Summary of published pre-coating substrates of neural cells**

| Substrate(s) | Disease                                    | Cell type                       | Plate format  | Throughput | Assay format                    | Readout(s)                                                                                                          | Ref. |
|--------------|--------------------------------------------|---------------------------------|---------------|------------|---------------------------------|---------------------------------------------------------------------------------------------------------------------|------|
| PLO          | Spinal muscular atrophy                    | Motor neurons                   | 384-well      | high       | Immunofluorescence              | Cytoplasmic and nuclear SMN protein levels                                                                          | 27   |
| PDL          | Human iPSCs                                | Neurons                         | 384-well      | high       | Fluorescence                    | neuronal cell viability, neurite outgrowth, Mitochondrial Membrane Potential Assay                                  | 28   |
| Matrigel     | Amyotrophic lateral sclerosis              | Motor neurons                   | 384-well      | high       | Immunofluorescence              | ISLET1 and TDP-43 aggregates                                                                                        | 29   |
|              | Rett syndrome                              | Neurons                         | dish          | Low        | Fluorescence, electrophysiology | Immunocytochemistry, neuronal morphology quantification, Cell cycle analysis, calcium imaging and electrophysiology | 30   |
|              | Fragile X Syndrome                         | Neuronal Progenitors            | 384-well      | High       | Fluorescence                    | FMRP expression                                                                                                     | 31   |
| Geltrex      | Dermatology patients or healthy volunteers | Dopaminergic neurons            | 96-well       | Medium     | Fluorescence                    | Flow cytometry or immunostaining of neuronal markers                                                                | 32   |
|              | Fragile X Syndrome                         | Neural Stem Cells               | 384,1536-well | High       | TR-FRET                         | TR-FRET-Based FMRP Assay                                                                                            | 33   |
|              | NCRM-1 iPSC line                           | NSCs                            | 96-well       | Medium     | Absorbance                      | MTT cell viability assay                                                                                            | 34   |
| LN+PLO       | Alzheimer disease                          | Neurons                         | 384-well      | high       | Luminescence                    | ATP content cell viability                                                                                          | 35   |
|              | Huntington disease                         | Neural stem cells               | 384-well      | high       | Luminescence                    | Derepression of reporter                                                                                            | 36   |
|              | Human iPSCs                                | Neural Progenitors              | 384-well      | High       | Luminescence                    | TCF/LEF Luciferase Reporter Assay                                                                                   | 37   |
|              | Human iPSCs                                | Neuroepithelial-like Stem Cells | 96-well       | Medium     | Luminescence                    | ATP content cell viability                                                                                          | 38   |
|              | NCRM-1 iPSC line                           | Neurons                         | 96-well       | Medium     | Absorbance                      | MTT cell viability assay                                                                                            | 39   |
| LN+PLO+FN    | Familial dysautonomia                      | Neural crest cells              | 384-well      | high       | qRT-PCR                         | WT IKBKAP                                                                                                           | 40   |
| LN+PDL+FN    | Human iPSCs                                | GABAergic neurons               | 4 or 8-well   | Low        | Fluorescence                    | hVGAT-mCherry expression                                                                                            | 41   |

PLO, poly-L-ornithine; PDL, Poly-D-Lysine; LN, laminin; FN, fibronectin

**Table S4.** Summary of the antibodies

|           | <b>Name</b>                                      | <b>Isotype</b> | <b>Vendor</b>     | <b>Catalog#</b> | <b>Dilution factor</b> |
|-----------|--------------------------------------------------|----------------|-------------------|-----------------|------------------------|
| Primary   | Nestin                                           | Mouse          | Life Technologies | A24345          | 1:50                   |
|           | SOX-1                                            | Goat           | Life Technologies | A24347          | 1:50                   |
|           | SOX-2                                            | Mouse          | Cell Signaling    | 4900S           | 1:50                   |
|           | PAX6                                             | Rabbit         | Life Technologies | A24340          | 1:50                   |
|           | Vimentin                                         | Rabbit         | Cell Signaling    | 5741S           | 1:100                  |
|           | SSEA4                                            | Mouse          | Cell Signaling    | 4755S           | 1:500                  |
|           | $\beta$ 3-Tubulin                                | Rabbit         | Cell Signaling    | 5568S           | 1:200                  |
|           | MAP2                                             | Rabbit         | Cell Signaling    | 8707S           | 1:200                  |
|           | Neurofilament-L                                  | Rabbit         | Cell Signaling    | 28374S          | 1:100                  |
|           | GFAP                                             | Mouse          | Cell Signaling    | 3670S           | 1:200                  |
| Secondary | Anti-Rabbit IgG (H+L), Alexa Fluor 488 conjugate | Donkey         | Life Technologies | A21206          | 1:200                  |
|           | Anti-Mouse IgG (H+L), Alexa Fluor 594 conjugate  | Rabbit         | Life Technologies | A11062          | 1:200                  |
|           | Anti-Goat IgG (H+L), Alexa Fluor 488 conjugate   | Donkey         | Life Technologies | A11055          | 1:200                  |



## Supplemental references

1. Yu, D.; Swaroop, M.; Wang, M.; et al. Niemann-Pick Disease Type C: Induced Pluripotent Stem Cell-Derived Neuronal Cells for Modeling Neural Disease and Evaluating Drug Efficacy. *J Biomol Screen*. **2014**, *19*, 1164-1173.
2. Beers, J.; Gulbranson, D. R.; George, N.; et al. Passaging and colony expansion of human pluripotent stem cells by enzyme-free dissociation in chemically defined culture conditions. *Nat Protoc*. **2012**, *7*, 2029-40.
3. Ross, S. B.; Stenfors, C. DSP4, a selective neurotoxin for the locus coeruleus noradrenergic system. A review of its mode of action. *Neurotoxicity research*. **2015**, *27*, 15-30.
4. Callaway, J. K.; Beart, P. M.; Jarrott, B.; et al. Incorporation of sodium channel blocking and free radical scavenging activities into a single drug, AM-36, results in profound inhibition of neuronal apoptosis. *British journal of pharmacology*. **2001**, *132*, 1691-8.
5. Bilsland, J.; Roy, S.; Xanthoudakis, S.; et al. Caspase inhibitors attenuate 1-methyl-4-phenylpyridinium toxicity in primary cultures of mesencephalic dopaminergic neurons. *J Neurosci*. **2002**, *22*, 2637-49.
6. Pizzurro, D. M.; Dao, K.; Costa, L. G. Astrocytes protect against diazinon- and diazoxon-induced inhibition of neurite outgrowth by regulating neuronal glutathione. *Toxicology*. **2014**, *318*, 59-68.
7. Veronesi, B.; Ehrich, M. Differential cytotoxic sensitivity in mouse and human cell lines exposed to organophosphate insecticides. *Toxicology and applied pharmacology*. **1993**, *120*, 240-6.
8. Vidau, C.; Gonzalez-Polo, R. A.; Niso-Santano, M.; et al. Fipronil is a powerful uncoupler of oxidative phosphorylation that triggers apoptosis in human neuronal cell line SHSY5Y. *Neurotoxicology*. **2011**, *32*, 935-43.
9. Wise, L. D.; Allen, H. L.; Hoe, C. M.; et al. Developmental neurotoxicity evaluation of the avermectin pesticide, emamectin benzoate, in Sprague-Dawley rats. *Neurotoxicology and teratology*. **1997**, *19*, 315-26.
10. Fan, P.; Fan, S.; Wang, H.; et al. Genistein decreases the breast cancer stem-like cell population through Hedgehog pathway. *Stem cell research & therapy*. **2013**, *4*, 146.
11. Poljakova, J.; Eckschlager, T.; Hrebackova, J.; et al. The comparison of cytotoxicity of the anticancer drugs doxorubicin and ellipticine to human neuroblastoma cells. *Interdisciplinary toxicology*. **2008**, *1*, 186-9.
12. Gati, W. P.; Paterson, A. R.; Larratt, L. M.; et al. Sensitivity of acute leukemia cells to cytarabine is a correlate of cellular es nucleoside transporter site content measured by flow cytometry with SAENTA-fluorescein. *Blood*. **1997**, *90*, 346-53.
13. Liebmann, J. E.; Cook, J. A.; Lipschultz, C.; et al. Cytotoxic studies of paclitaxel (Taxol) in human tumour cell lines. *British journal of cancer*. **1993**, *68*, 1104-9.
14. Sprowl, J. A.; Ciarimboli, G.; Lancaster, C. S.; et al. Oxaliplatin-induced neurotoxicity is dependent on the organic cation transporter OCT2. *Proc Natl Acad Sci U S A*. **2013**, *110*, 11199-204.
15. Guzzi, G.; Pigatto, P. D.; Spadari, F.; et al. Effect of thimerosal, methylmercury, and mercuric chloride in Jurkat T Cell Line. *Interdisciplinary toxicology*. **2012**, *5*, 159-61.
16. Lin, Z.; Will, Y. Evaluation of drugs with specific organ toxicities in organ-specific cell lines. *Toxicological sciences : an official journal of the Society of Toxicology*. **2012**, *126*, 114-27.
17. Benvenisti-Zarom, L.; Chen, J.; Regan, R. F. The oxidative neurotoxicity of clioquinol. *Neuropharmacology*. **2005**, *49*, 687-94.
18. Sato, A.; Fujiwara, H.; Oku, H.; et al. Alpha-mangostin induces Ca<sup>2+</sup>-ATPase-dependent apoptosis via mitochondrial pathway in PC12 cells. *Journal of pharmacological sciences*. **2004**, *95*, 33-40.
19. Benbrik, E.; Chariot, P.; Bonavaud, S.; et al. Cellular and mitochondrial toxicity of zidovudine (AZT), didanosine (ddl) and zalcitabine (ddC) on cultured human muscle cells. *Journal of the neurological sciences*. **1997**, *149*, 19-25.

20. Ho, Y. C.; Huang, F. M.; Chang, Y. C. Mechanisms of cytotoxicity of eugenol in human osteoblastic cells in vitro. *International endodontic journal*. **2006**, *39*, 389-93.
21. Liu, P.; Brown, S.; Goktug, T.; et al. Cytotoxic effect of disulfiram/copper on human glioblastoma cell lines and ALDH-positive cancer-stem-like cells. *British journal of cancer*. **2012**, *107*, 1488-97.
22. Hymery, N.; Masson, F.; Barbier, G.; et al. Cytotoxicity and immunotoxicity of cyclopiazonic acid on human cells. *Toxicology in vitro : an international journal published in association with BIBRA*. **2014**, *28*, 940-7.
23. Schechter, M. D. Functional consequences of fenfluramine neurotoxicity. *Pharmacology, biochemistry, and behavior*. **1990**, *37*, 623-6.
24. Richardson, J. R.; Quan, Y.; Sherer, T. B.; et al. Paraquat neurotoxicity is distinct from that of MPTP and rotenone. *Toxicological sciences : an official journal of the Society of Toxicology*. **2005**, *88*, 193-201.
25. Colak, S.; Geyikoglu, F.; Keles, O. N.; et al. The neuroprotective role of boric acid on aluminum chloride-induced neurotoxicity. *Toxicology and industrial health*. **2011**, *27*, 700-10.
26. Morgan, S. C.; Taylor, D. L.; Pocock, J. M. Microglia release activators of neuronal proliferation mediated by activation of mitogen-activated protein kinase, phosphatidylinositol-3-kinase/Akt and delta-Notch signalling cascades. *Journal of neurochemistry*. **2004**, *90*, 89-101.
27. Makhortova, N. R.; Hayhurst, M.; Cerqueira, A.; et al. A screen for regulators of survival of motor neuron protein levels. *Nature chemical biology*. **2011**, *7*, 544-52.
28. Sirenko, O.; Hesley, J.; Rusyn, I.; et al. High-content high-throughput assays for characterizing the viability and morphology of human iPSC-derived neuronal cultures. *Assay and drug development technologies*. **2014**, *12*, 536-47.
29. Burkhardt, M. F.; Martinez, F. J.; Wright, S.; et al. A cellular model for sporadic ALS using patient-derived induced pluripotent stem cells. *Molecular and cellular neurosciences*. **2013**, *56*, 355-64.
30. Marchetto, M. C.; Carrameu, C.; Acab, A.; et al. A model for neural development and treatment of Rett syndrome using human induced pluripotent stem cells. *Cell*. **2010**, *143*, 527-39.
31. Kaufmann, M.; Schuffenhauer, A.; Fruh, I.; et al. High-Throughput Screening Using iPSC-Derived Neuronal Progenitors to Identify Compounds Counteracting Epigenetic Gene Silencing in Fragile X Syndrome. *J Biomol Screen*. **2015**, *20*, 1101-11.
32. Paull, D.; Sevilla, A.; Zhou, H.; et al. Automated, high-throughput derivation, characterization and differentiation of induced pluripotent stem cells. *Nature methods*. **2015**, *12*, 885-92.
33. Kumari, D.; Swaroop, M.; Southall, N.; et al. High-Throughput Screening to Identify Compounds That Increase Fragile X Mental Retardation Protein Expression in Neural Stem Cells Differentiated From Fragile X Syndrome Patient-Derived Induced Pluripotent Stem Cells. *Stem cells translational medicine*. **2015**, *4*, 800-8.
34. Malik, N.; Efthymiou, A. G.; Mather, K.; et al. Compounds with species and cell type specific toxicity identified in a 2000 compound drug screen of neural stem cells and rat mixed cortical neurons. *Neurotoxicology*. **2014**, *45*, 192-200.
35. Xu, X.; Lei, Y.; Luo, J.; et al. Prevention of beta-amyloid induced toxicity in human iPS cell-derived neurons by inhibition of Cyclin-dependent kinases and associated cell cycle events. *Stem cell research*. **2013**, *10*, 213-27.
36. Charbord, J.; Poydenot, P.; Bonnefond, C.; et al. High throughput screening for inhibitors of REST in neural derivatives of human embryonic stem cells reveals a chemical compound that promotes expression of neuronal genes. *Stem Cells*. **2013**, *31*, 1816-28.
37. Zhao, W. N.; Cheng, C.; Theriault, K. M.; et al. A high-throughput screen for Wnt/beta-catenin signaling pathway modulators in human iPSC-derived neural progenitors. *J Biomol Screen*. **2012**, *17*, 1252-63.

38. McLaren, D.; Gorba, T.; Marguerie de Rotrou, A.; et al. Automated large-scale culture and medium-throughput chemical screen for modulators of proliferation and viability of human induced pluripotent stem cell-derived neuroepithelial-like stem cells. *J Biomol Screen*. **2013**, *18*, 258-68.
39. Efthymiou, A.; Shaltouki, A.; Steiner, J. P.; et al. Functional screening assays with neurons generated from pluripotent stem cell-derived neural stem cells. *J Biomol Screen*. **2014**, *19*, 32-43.
40. Lee, G.; Ramirez, C. N.; Kim, H.; et al. Large-scale screening using familial dysautonomia induced pluripotent stem cells identifies compounds that rescue IKBKAP expression. *Nature biotechnology*. **2012**, *30*, 1244-8.
41. DeRosa, B. A.; Belle, K. C.; Thomas, B. J.; et al. hVGAT-mCherry: A novel molecular tool for analysis of GABAergic neurons derived from human pluripotent stem cells. *Molecular and cellular neurosciences*. **2015**, *68*, 244-57.
